# Supplementary material for: Recognition of discrete export signals in early flagellar subunits during bacterial type III secretion
Source: eLife journal article supplement (doi:10.7554/elife.66264), 2022-03-03

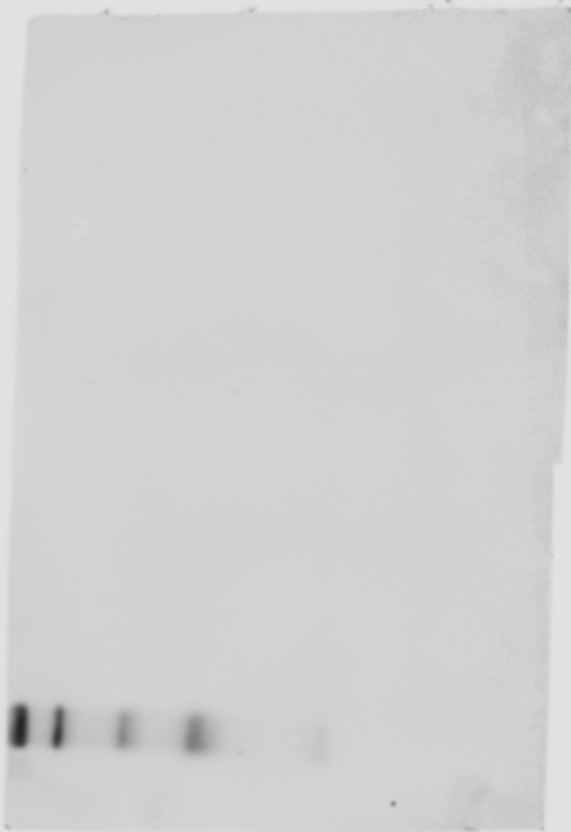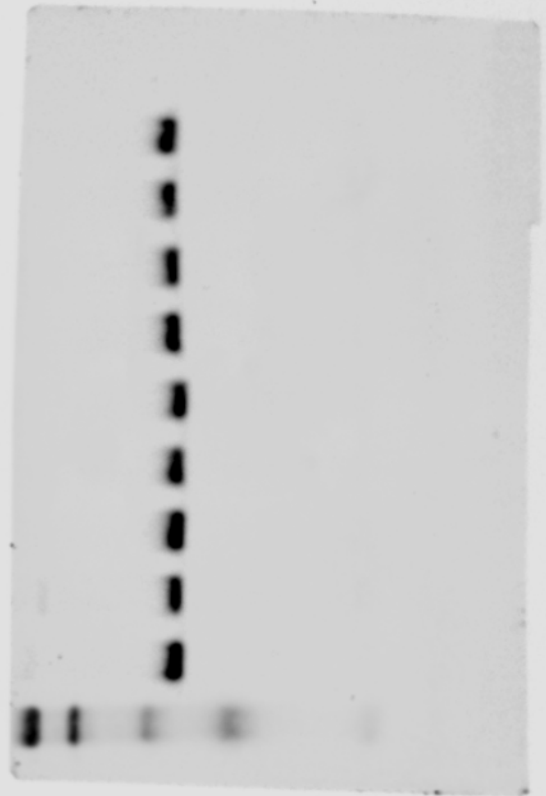

Supplement: fig2-figsupp2-data4 [file elife-66264-fig2-figsupp2-data4-v2.pdf]
